# Supplementary material
Source: publisher site journal article supplement (https://www.dovepress.com/article/303761)
Supplement: Supplementary file 1 [file get_supplementary_file.php]

Table S1. Critical error checklist in the study, stratified by device type

| Device type | Critical error type | Critical error |
| --- | --- | --- |
| Turbuhaler | Preparation error | Did not open the device correctly |
|  |  | Did not prime with device upright |
|  | Delivery error | Did not seal lips around mouthpiece during inhalation |
|  |  | Did not inhale forcefully or deeply |
| Breezhaler | Preparation error | Did not open the device correctly |
|  |  | Did not place capsule in the chamber |
|  |  | Did not close the mouthpiece |
|  |  | Did not press button to pierce the capsule |
|  | Delivery error | Did not seal lips around mouthpiece during inhalation |
|  |  | Did not inhale forcefully or deeply |
|  |  | Did not remove capsule and check for powder residue |
| Ellipta | Preparation error | Did not open the device correctly |
|  | Delivery error | Did not seal lips around mouthpiece during inhalation |
|  |  | Did not inhale forcefully or deeply |
| Diskus | Preparation error | Did not open the device correctly |
|  |  | Did not pull the lever fully back |
|  | Delivery error | Did not seal lips around mouthpiece during inhalation |
|  |  | Did not inhale forcefully or deeply |
| Genuair | Preparation error | Did not open the device correctly |
|  |  | Did not hold the inhaler horizontally (green button facing upwards) for priming |
|  | Delivery error | Did not seal lips around mouthpiece during inhalation |
|  |  | Did not inhale forcefully or deeply |
| Respimat | Preparation error | Did not twist the base one half-turn |
|  |  | Did not open the device correctly |
|  | Delivery error | Did not seal lips around mouthpiece during inhalation |
|  |  | Did not synchronize actuation and inhalation |
|  |  | Did not inhale slowly and deeply |
| pMDI | Preparation error | Did not open the device correctly |
|  |  | Did not shake well (suspension formulations only) |
|  |  | Did not keep inhaler upright |
|  | Delivery error | Did not seal lips around mouthpiece during inhalation |
|  |  | Did not synchronize actuation and inhalation |
|  |  | Did not inhale slowly and deeply |

pMDI = pressurized metered dose inhaler
